# Supplementary material for: Synthesis of SnO2versus Sn crystals within N-doped porous carbon nanofibers via electrospinning towards high-performance lithium ion batteries
Source: Royal Society of Chemistry journal article supplement (doi:10.1039/c5nr09305h), 2016-01-01
Supplement: c5nr09305h1.pdf [file c5nr09305h1.pdf]

## Supporting Information

### Synthesis of $\text{SnO}_2$ versus Sn Crystals within N-doped Porous Carbon Nanofibers via Electrospinning towards High-Performance Lithium Ion Batteries

Hongkang Wang,<sup>a,\*</sup> Xuan Lu,<sup>b</sup> Longchao Li,<sup>c</sup> Beibei Li,<sup>a</sup> Daxian Cao,<sup>a</sup> Qizhen Wu,<sup>a</sup> Zhihui Li,<sup>a</sup> Guang Yang,<sup>b,\*</sup> Baolin Guo,<sup>c,\*</sup> and Chunming Niu<sup>a</sup>

<sup>a</sup> Center of Nanomaterials for Renewable Energy (CNRE), State Key Lab of Electrical Insulation and Power Equipment, School of Electrical Engineering, Xi'an Jiaotong University, Xi'an, China 710049

<sup>b</sup> Electronic Materials Research Laboratory, Key Laboratory of the Ministry of Education & International Center for Dielectric Research, Xi'an Jiaotong University, Xi'an, China 710049

<sup>c</sup> Center for Biomedical Engineering and Regenerative Medicine, Frontier Institute of Science and Technology, Xi'an Jiaotong University, Xi'an, China 710049

\*Address correspondence to hongkang.wang@mail.xjtu.edu.cn, g.yang@mail.xjtu.edu.cn and baoling@mail.xjtu.edu.cn

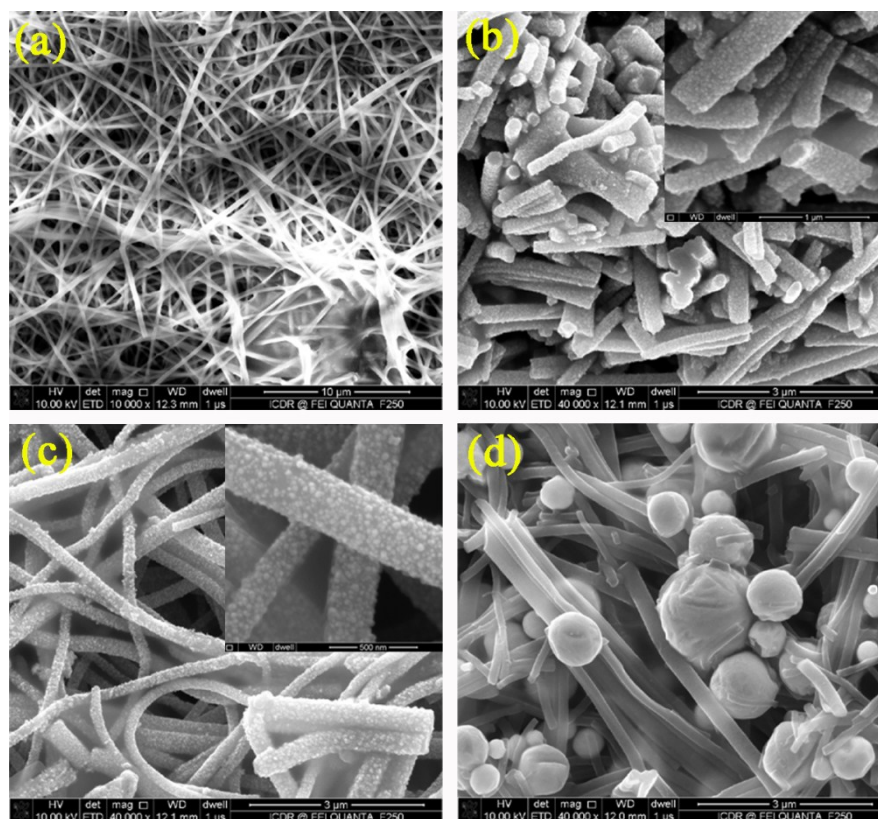

Figure S1. (a, b) SEM images of (a) the as-prepared electrospun PVP/SnCl<sub>2</sub> nanofibers and (b) their counterpart after annealing at 350 °C in air for 1 h. (c, d) SEM images of (c) the SnO<sub>2</sub>/SCNFs

(d) Sn/SCNFs obtained after annealing (b) at 500 and 800 °C in N<sub>2</sub>, respectively. **SCNFs: solid carbon nanofibers.**

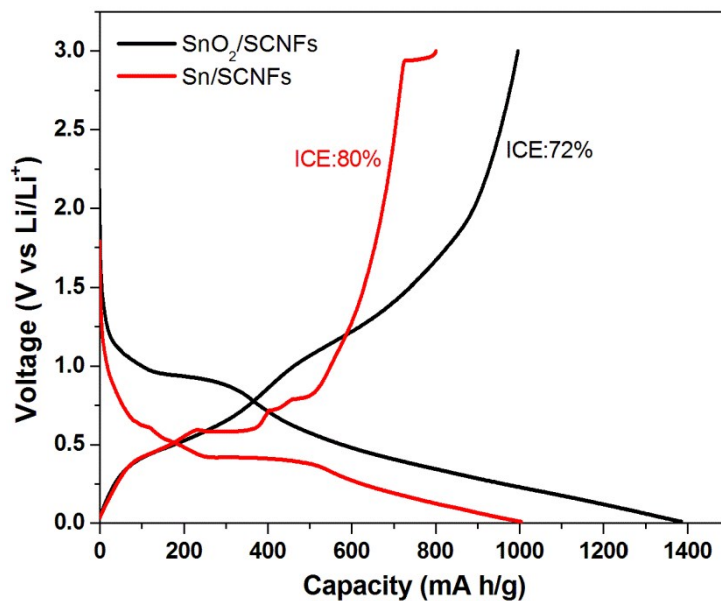

Figure S2. Initial galvanostatic discharge-charge profiles of (a) SnO<sub>2</sub>/SCNFs and (b) Sn/SCNFs at 200 mA/g in the range of 0.01-3.0 V.

As shown in Figure S2, the initial Coulombic efficiencies in the SnO<sub>2</sub>/SCNFs (72%) and Sn/SCNFs (80%) electrodes are comparable with that of their SnO<sub>2</sub>/PCNFs (71.2%) and Sn/PCNFs (83.3%) counterparts, indicating the porous carbon nanofibers with large surface area does not contribute to larger irreversible capacity in the first discharge process. Therefore, we propose that the formation of SEI layer involving the electrolyte decomposition mainly happens on the out surface of carbon nanostructures, as SEI is dense thin layer on surface, which prevents the SEI formation in the inner surface of carbon nanofibers.

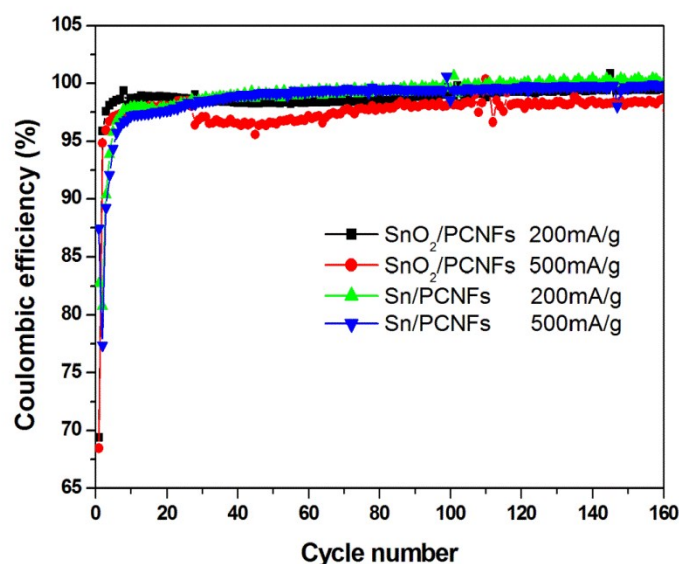

Figure S3. Coulombic efficiencies along with cycle numbers for SnO<sub>2</sub>/PCNFs and Sn/PCNFs electrodes at different current densities.

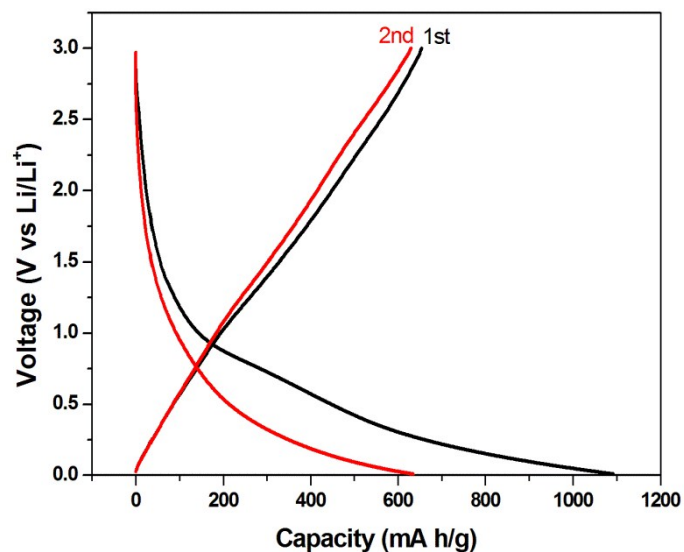

Figure S4. Galvanostatic discharge-charge profiles of PCNFs at 200 mA/g in the range of 0.01-3.0 V. The PCNFs were obtained by etching Sn in Sn/PCNFs with HF, whose carbon content is ~15 wt% as revealed by TGA. The initial reversible discharge capacity of carbon nanofibers is 634 mA h/g, so the carbon nanofibers contributed only 95 mA h/g in Sn/PCNFs (the initial reversible discharge is 1021 mA h/g). The capacity contribution of PCNFs in Sn/PCNFs is only 9.3%.

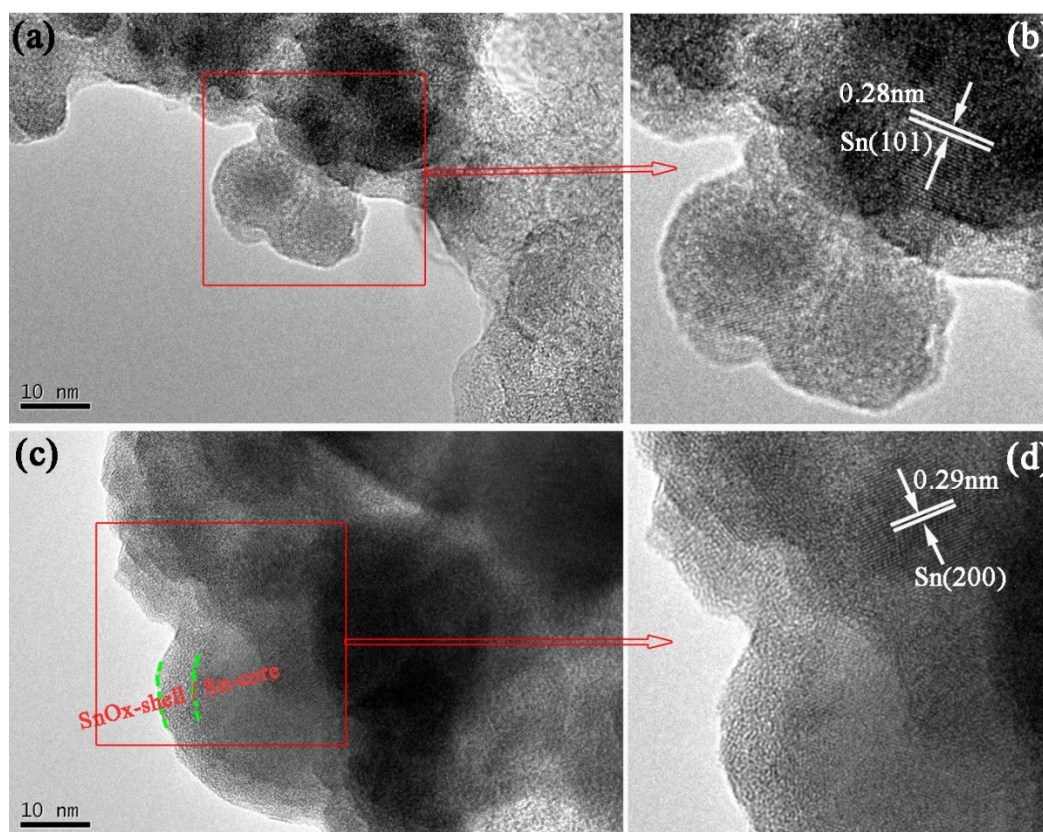

Figure S5. TEM and HRTEM images of the charged (a, b) SnO<sub>2</sub>/PCNFs and (c, d) Sn/PCNFs electrodes after cycling at 200 mA/g for 200 cycles.

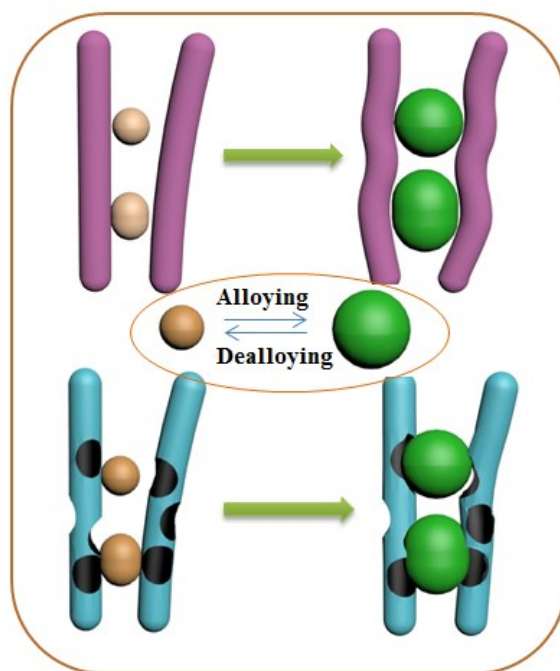

Scheme S1. Comparison of the Li-Sn alloying-dealloying process within solid and porous carbon nanofibers.
